# Supplementary material for: Tunable transport and optoelectronic properties of monolayer black phosphorus by grafting PdCl2quantum dots
Source: Royal Society of Chemistry journal article supplement (doi:10.1039/c8ra07053a), 2018-01-01
Supplement: c8ra07053a1.pdf [file c8ra07053a1.pdf]

## Tunable transport and optoelectronic properties of monolayer black phosphorus by grafting PdCl<sub>2</sub> quantum dots

Cuicui Sun, Yuxiu Wang, Yingjie Jiang, Zhao-Di Yang, Guiling Zhang,\* Yangyang Hu\*

*School of Materials Science and Engineering, College of Chemical and Environmental Engineering, Harbin University of Science and Technology, Harbin 150080, China.*

Table S1 gives the optimized supercell vectors of MLBP and  $n$ PdCl<sub>2</sub>-BP ( $n = 1, 2,$  and 4).

Table S2 summarizes the optimized supercell total energies of 20 configurations for all  $n$ PdCl<sub>2</sub>-BP ( $n = 1, 2,$  and 4) systems.

Fig. S1-S8 show the real-space scattering states of the  $a$ -MLBP,  $z$ -MLBP,  $a$ - $n$ PdCl<sub>2</sub>-BP, and  $z$ - $n$ PdCl<sub>2</sub>-BP ( $n = 1, 2,$  and 4) two-probe devices. Fourteen transport channels are obtained indicating that there exist fourteen subbands in the left electrode along the transport direction. It can be seen that the transport channels tend to be closed if more PdCl<sub>2</sub> quantum dots are attached due to their scattering effect. Moreover, the penetrating channel of  $z$ - $n$ PdCl<sub>2</sub>-BP is weaker at the right side than that of  $a$ - $n$ PdCl<sub>2</sub>-BP, giving the evidence that charge carriers transport easily along the armchair direction related to the zigzag direction.

Additional result:

**Table S1** The optimized supercell vectors of MLBP and  $n\text{PdCl}_2\text{-BP}$  ( $n = 1, 2,$  and  $4$ ).

| Species                | $x$ (Å) | $y$ (Å) | $z$ (Å) |
|------------------------|---------|---------|---------|
| MLBP                   | 8.714   | 13.253  | 30      |
| 1PdCl <sub>2</sub> -BP | 8.686   | 13.254  | 30      |
| 2PdCl <sub>2</sub> -BP | 8.426   | 13.231  | 30      |
| 4PdCl <sub>2</sub> -BP | 8.665   | 13.186  | 30      |

**Table S2** The optimized supercell total energies of 20 configurations for all  $n\text{PdCl}_2\text{-BP}$  ( $n = 1, 2,$  and  $4$ ) systems.

|                        |                                                                                                     |                                                                                                     |                                                                                                     |                                                                                                      |                                                                                                       |
|------------------------|-----------------------------------------------------------------------------------------------------|-----------------------------------------------------------------------------------------------------|-----------------------------------------------------------------------------------------------------|------------------------------------------------------------------------------------------------------|-------------------------------------------------------------------------------------------------------|
| 1PdCl <sub>2</sub> -BP | 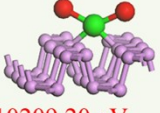<br>-10209.20 eV   | <br>-10207.38 eV   |                                                                                                     |                                                                                                      |                                                                                                       |
| 2PdCl <sub>2</sub> -BP | <br>-11968.72 eV  | <br>-11968.66 eV  | <br>-11968.53 eV  | <br>-11968.37 eV  | <br>-11968.27 eV  |
|                        | <br>-11967.81 eV | <br>-11965.11 eV | <br>-11965.07 eV | <br>-11965.03 eV | <br>-11964.94 eV |
| 4PdCl <sub>2</sub> -BP | <br>-15487.52 eV | <br>-15487.33 eV | <br>-15486.78 eV | <br>-15483.83 eV | <br>-15481.92 eV |
|                        | <br>-15480.21 eV | <br>-15480.17 eV | <br>-15480.09 eV |                                                                                                      |                                                                                                       |

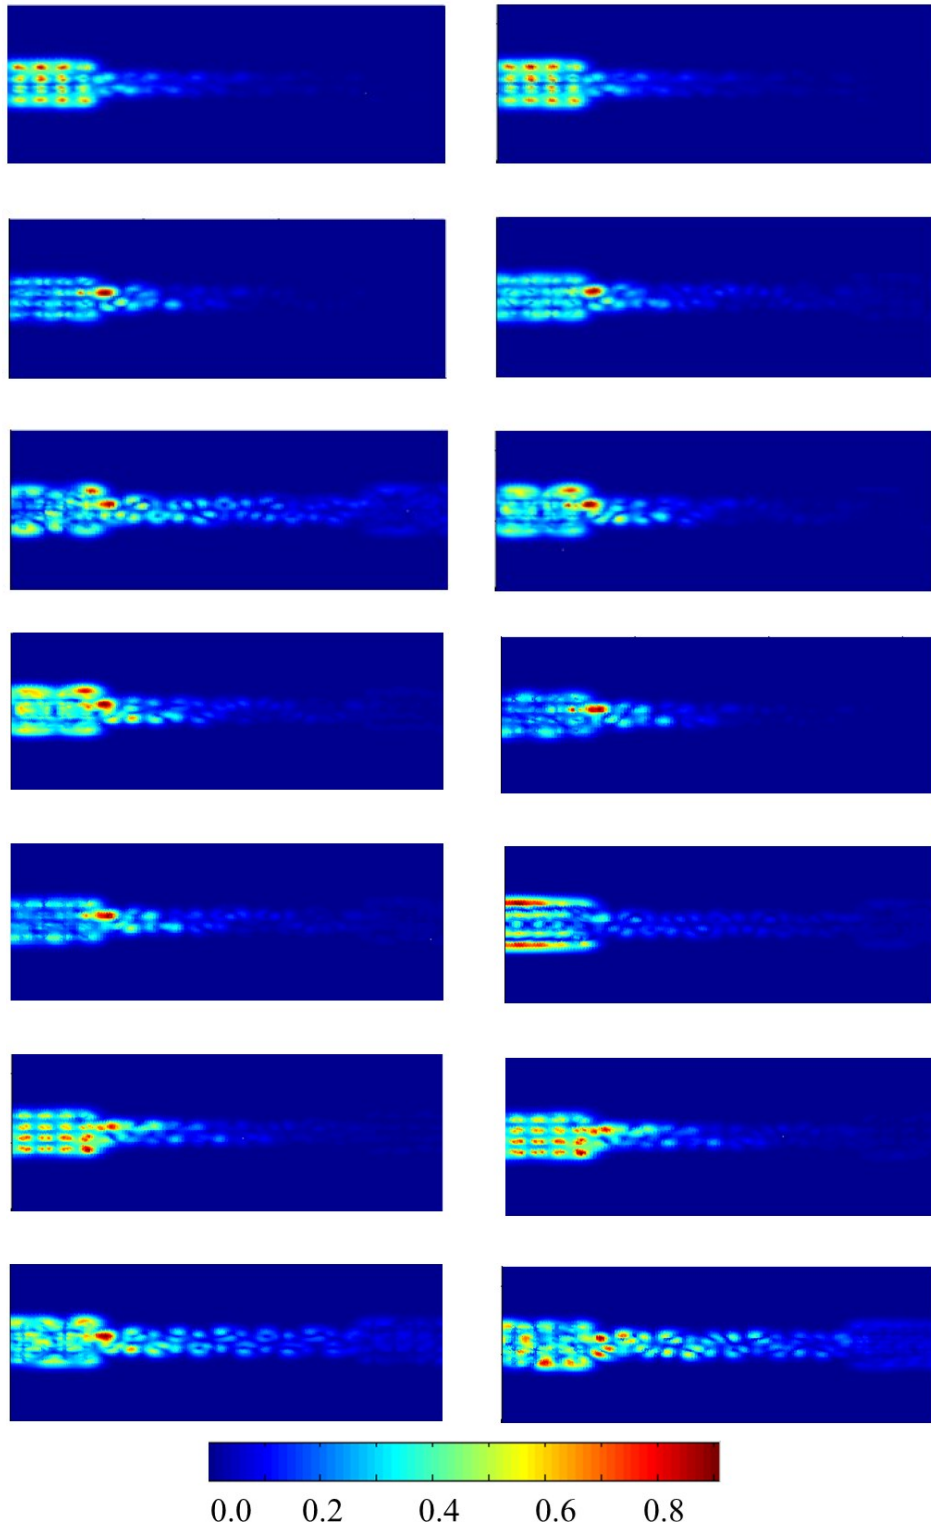

**Fig. S1** The real space scattering states of  $a$ -MLBP at Fermi energy  $E_f$ .

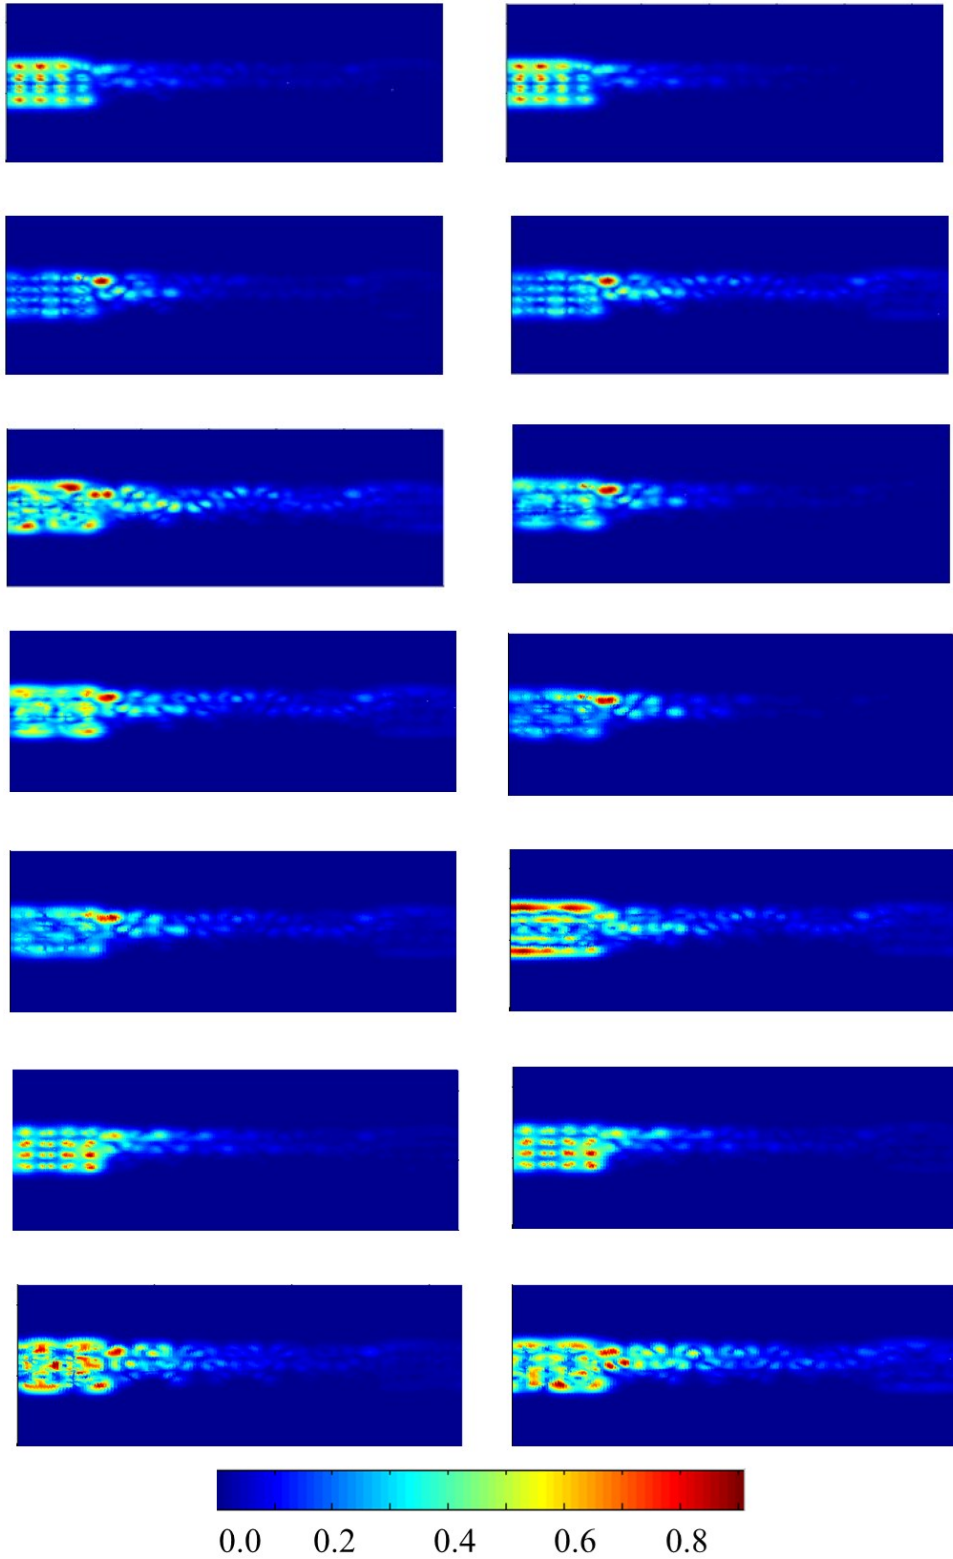

$\alpha$ -1PdCl<sub>2</sub>-BP  
**Fig. S2** The real space scattering states of  $\alpha$ -1PdCl<sub>2</sub>-BP at Fermi energy  $E_f$ .

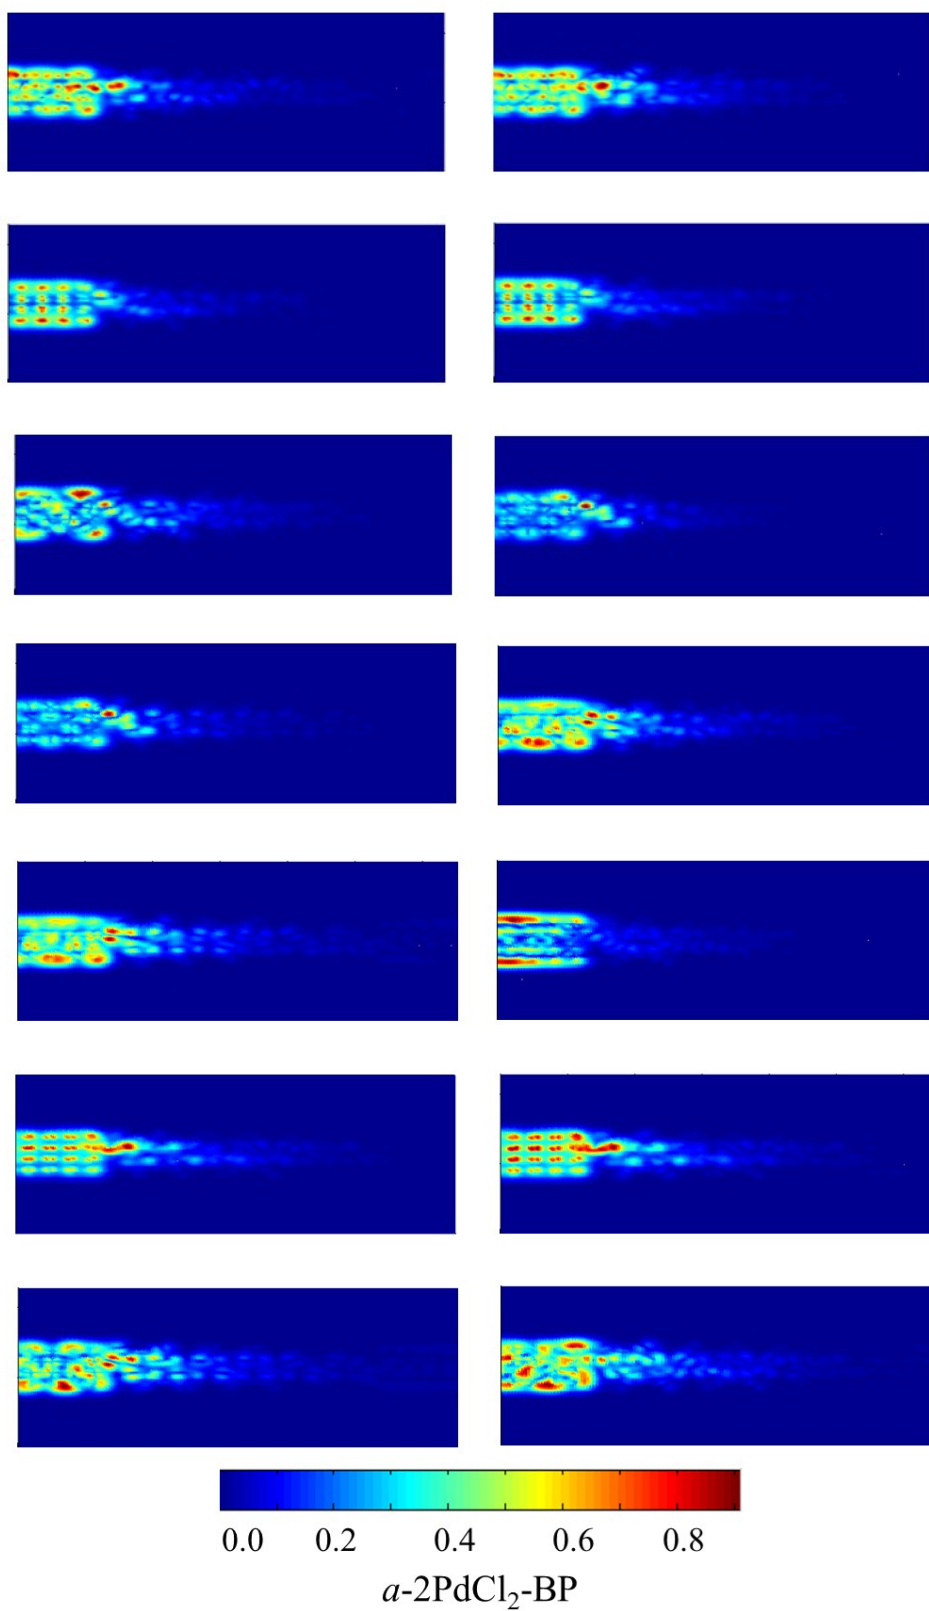

**Fig. S3** The real space scattering states of  $a$ - $2\text{PdCl}_2$ -BP at Fermi energy  $E_F$ .

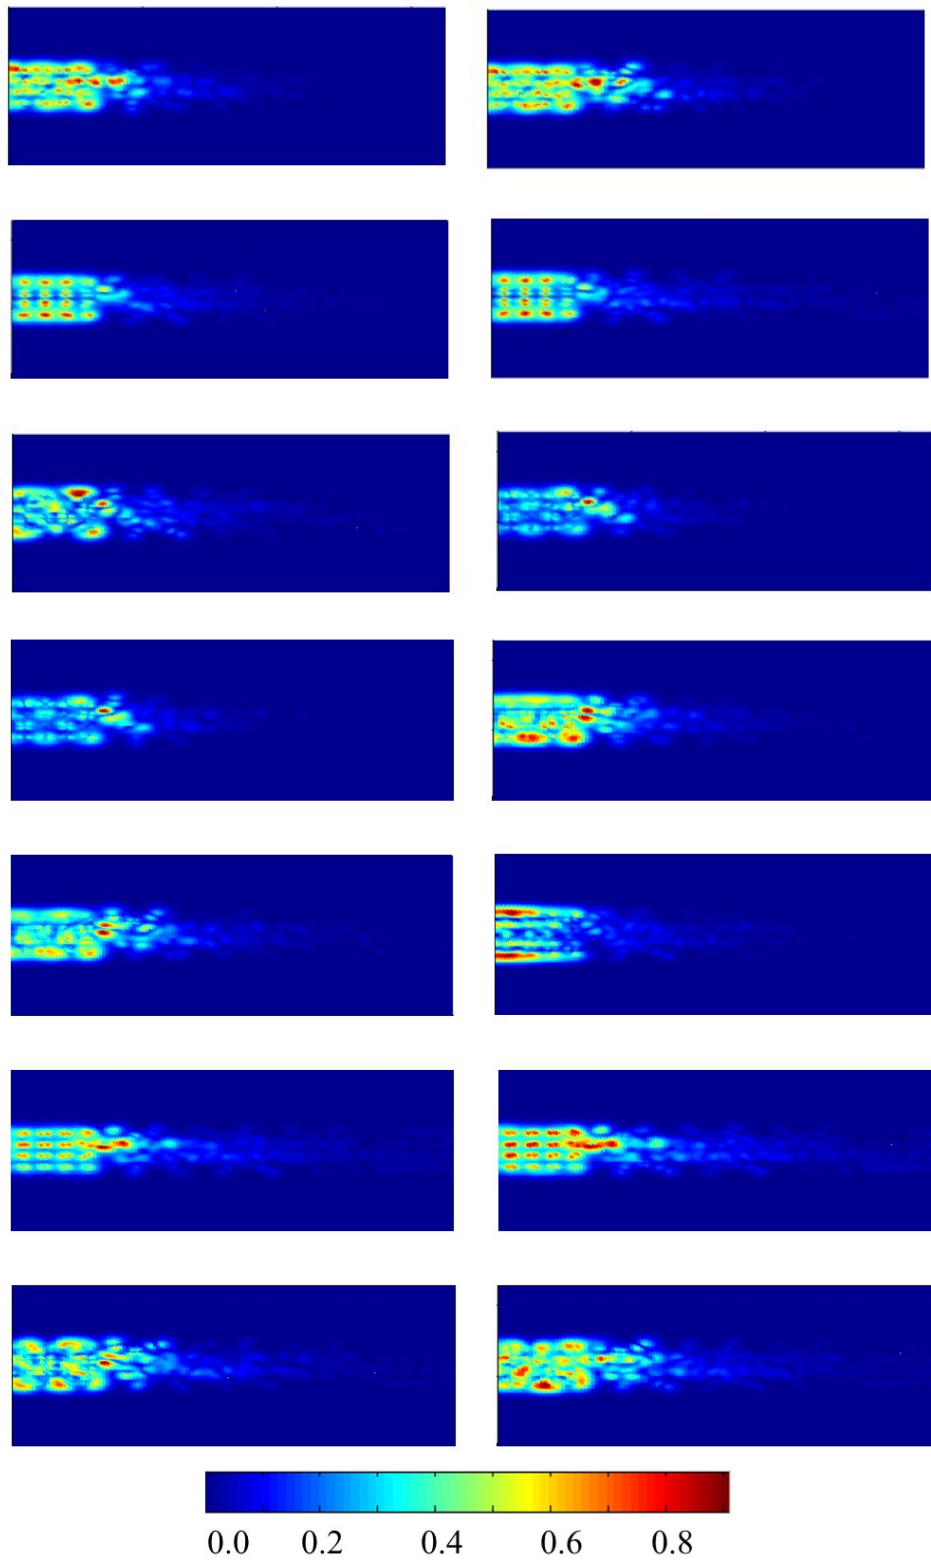

**Fig. S4** The real space scattering states of  $a\text{-4PdCl}_2\text{-BP}$  at Fermi energy  $E_F$ .

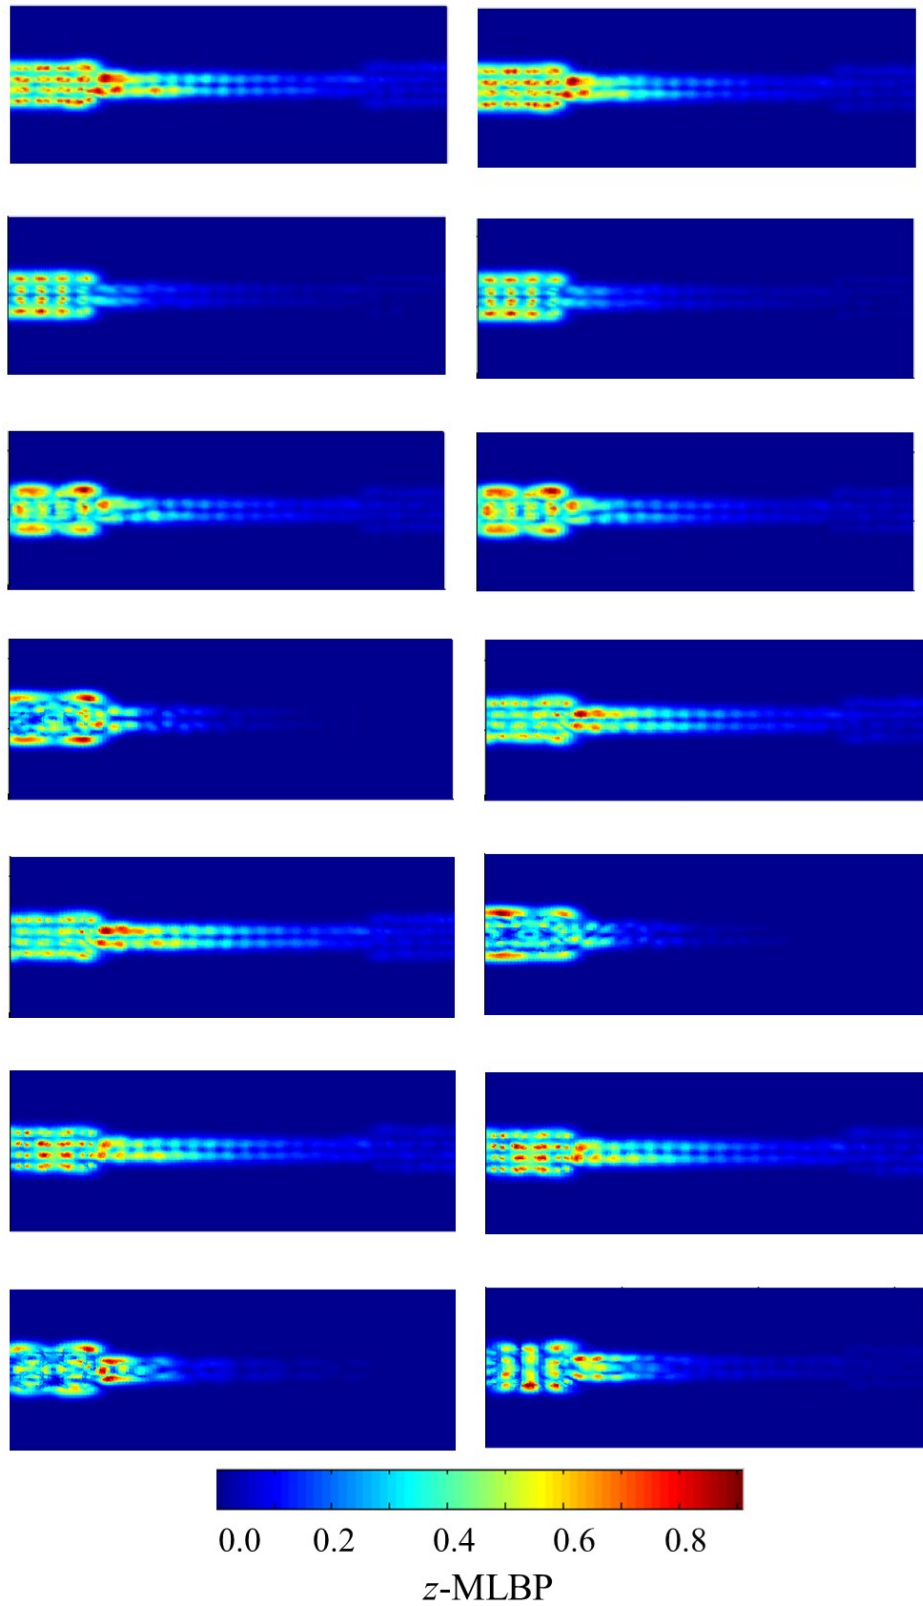

**Fig. S5** The real space scattering states of z-MLBP at Fermi energy  $E_f$ .

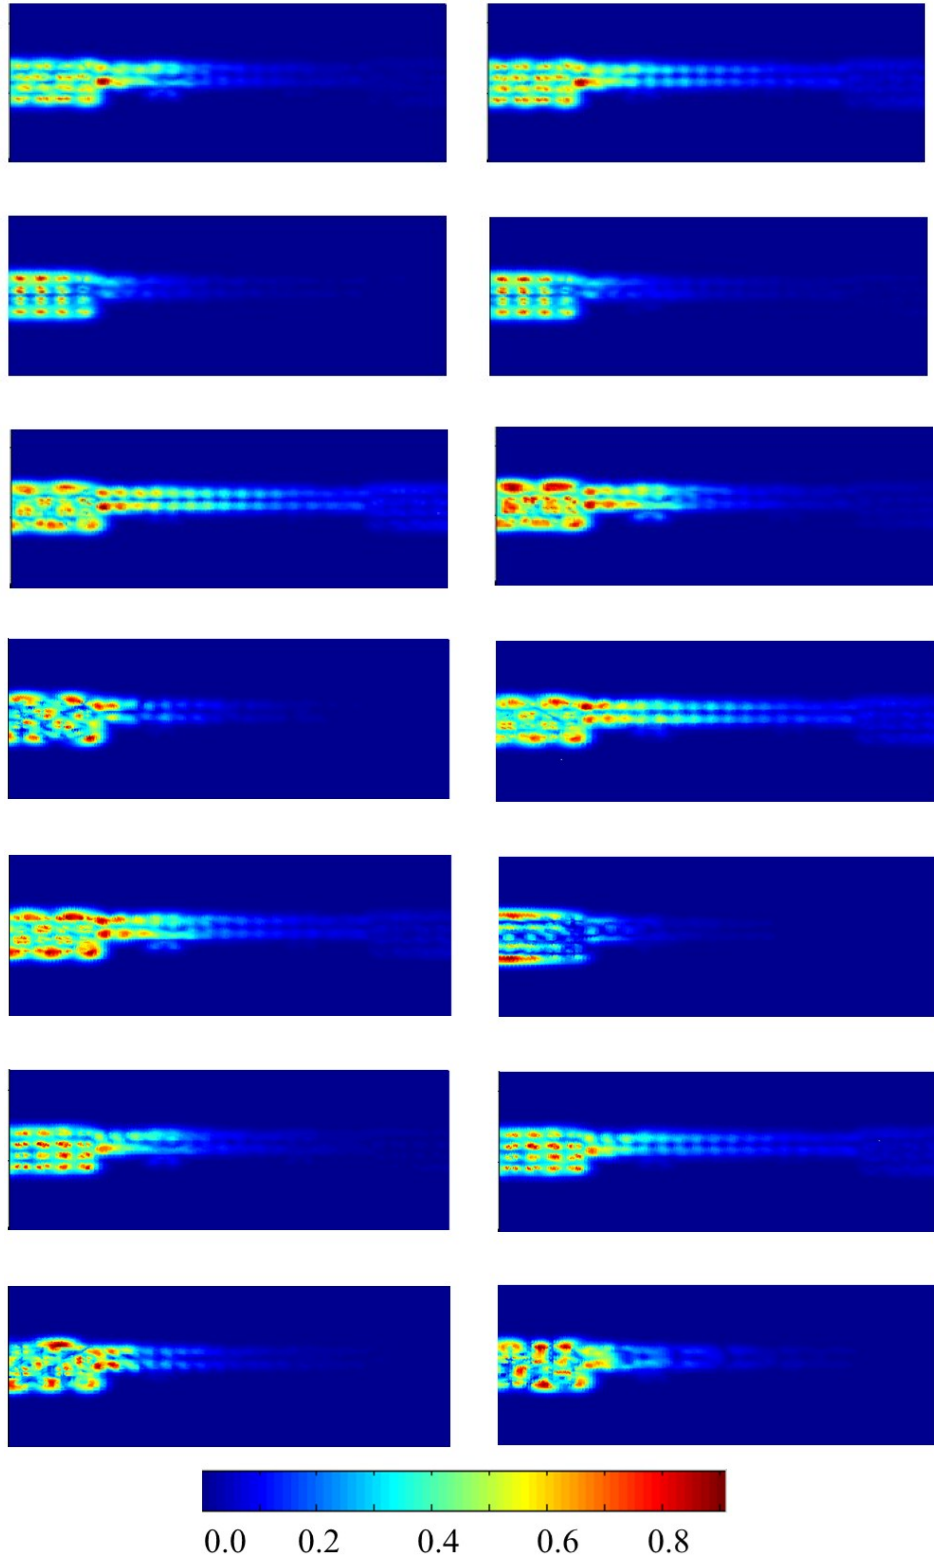

**Fig. S6** The real space scattering states of  $z$ -1PdCl<sub>2</sub>-BP at Fermi energy  $E_F$ .



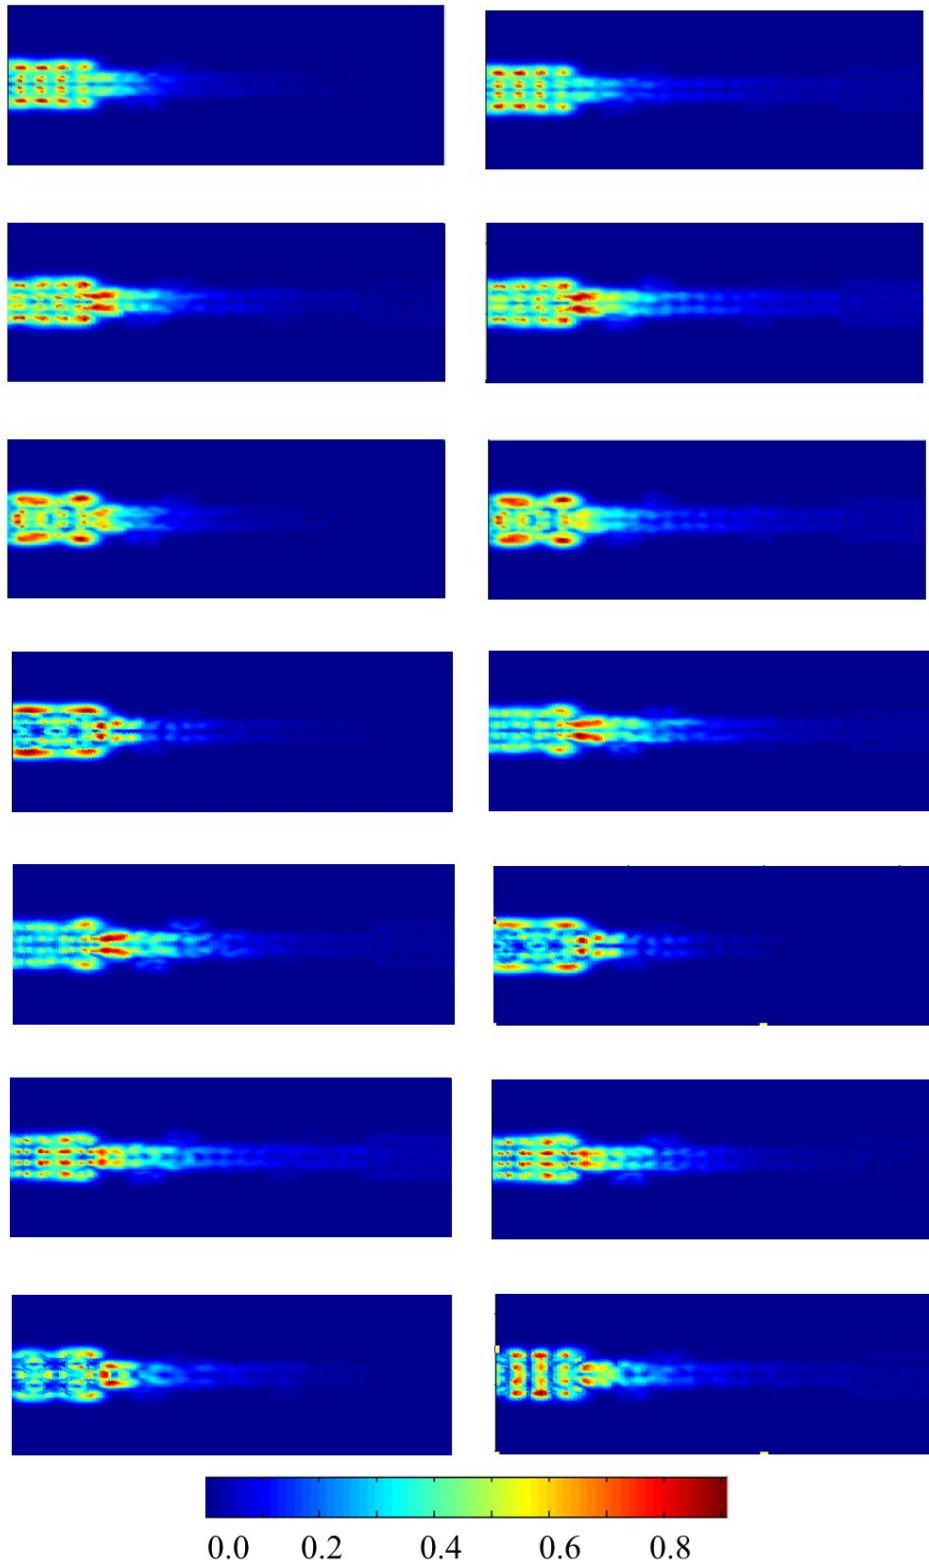

z-2PdCl<sub>2</sub>-BP  
**Fig. S7** The real space scattering states of z-2PdCl<sub>2</sub>-BP at Fermi energy  $E_F$ .

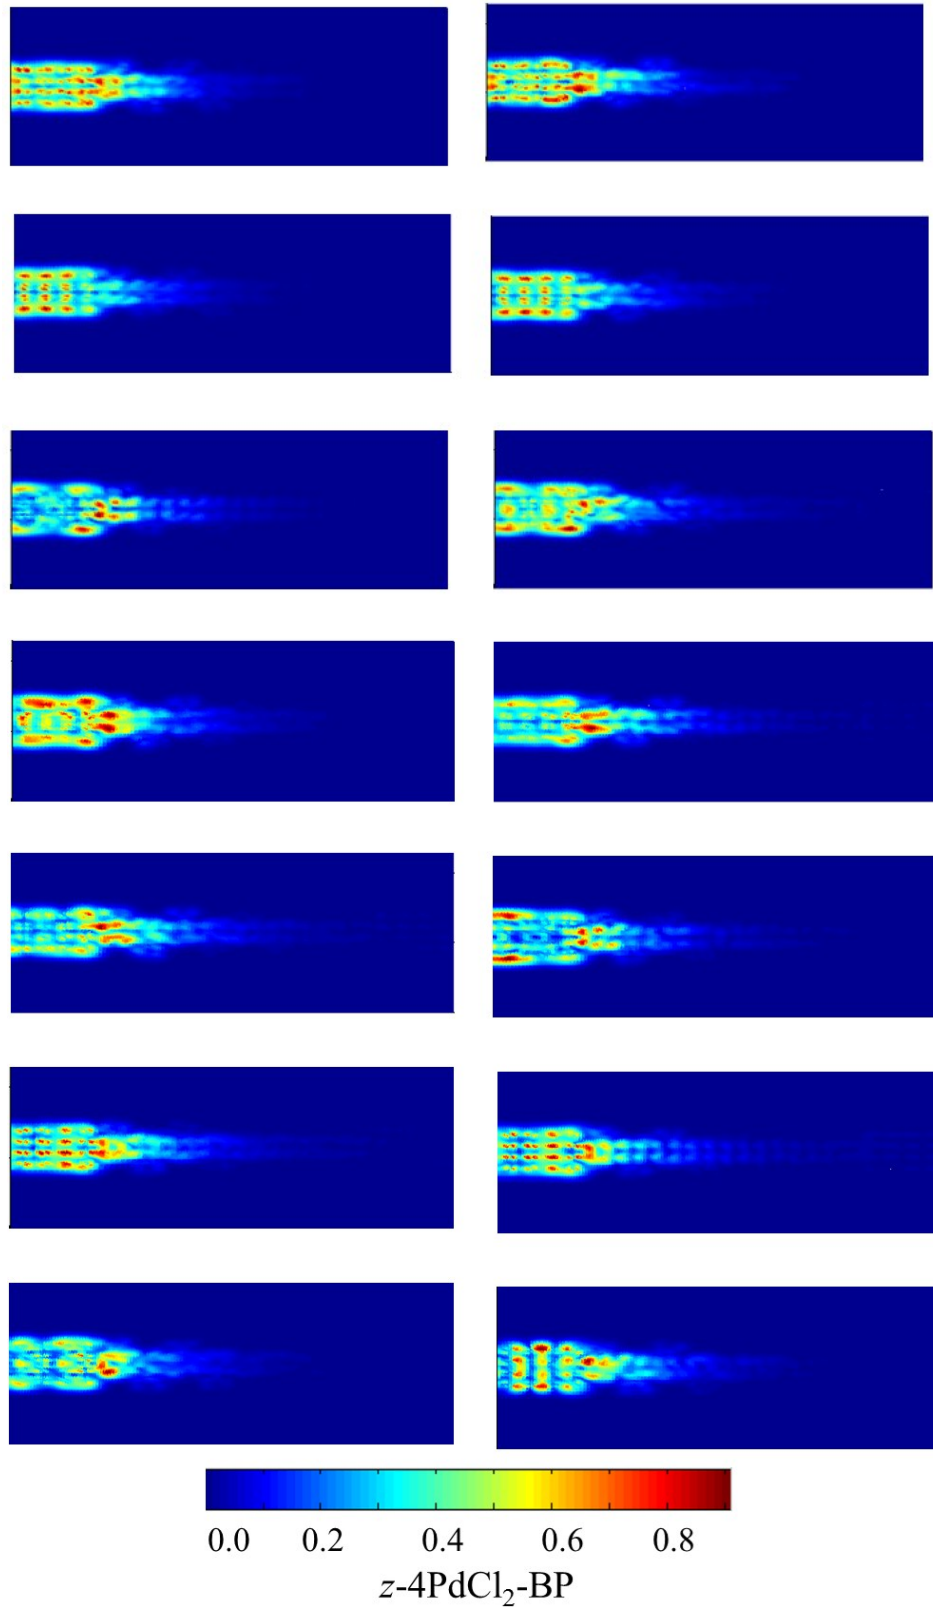

**Fig. S8** The real space scattering states of  $z\text{-}4\text{PdCl}_2\text{-BP}$  at Fermi energy  $E_f$ .
